# Supplementary material for: Edge AI Model Deployed for Real-time Detection of Atrial Fibrillation Risk during Sinus Rhythm
Source: Preprints.org preprint supplement (doi:10.20944/preprints202403.1575.v1), 2024-03-26
Supplement: Supplementary file 1 [file supplementary]

**Table S1.** The arrhythmia exclusion list.

| Second-degree Atrioventricular Block (Wenckebach) | PAC Trigeminy |
| --- | --- |
| Complete Atrioventricular Block | PVC Trigeminy |
| Second-degree Atrioventricular Block (Mobitz) | Frequent PAC |
| Second-degree Atrioventricular (2:1) | Frequent　PVC |
| Artificial Pacemaker Rhythm | PAC Bigeminy |
| Suspected Left Atrial Rhythm | PVC Bigeminy |
| Atrioventricular Junctional Rhythm | Sinoatrial(S-A) Block |
| Atrioventricular Dissociation | Supraventricular Tachycardia |
| Tachycardia | Short Runs of PAC |
| Bradycardia | Ventricular Tachycardia |
| Extreme Tachycardia | Short Runs of PVC |
| Extreme Bradycardia | Ventricular Rhythm |
| Escape Beat | Couplet PAC |
| Premature Atrial Contraction (PAC) | Couplet PVC |
| Premature Ventricular Contraction (PVC) | Atrial Fibrillation and Flutter |
